1 **Do antibody positive healthcare workers have lower SARS-CoV-2**  
2 **infection rates than antibody negative healthcare workers? Large**  
3 **multi-centre prospective cohort study (the SIREN study), England:**  
4 **June to November 2020**

5  
6 AUTHORS:

7 Hall V<sup>\*1,2</sup>, Foulkes S<sup>\*1</sup>, Charlett A<sup>1</sup>, Atti A<sup>1</sup>, Monk EJM<sup>1</sup>, Simmons R<sup>1</sup>, Wellington E<sup>1</sup>, Cole  
8 MJ<sup>1</sup>, Saei A<sup>1</sup>, Oguti B<sup>1</sup>, Munro K<sup>1</sup>, Wallace S<sup>1</sup>, Kirwan PD<sup>1</sup>, Shrotri M<sup>1</sup>, Vusirikala A<sup>1</sup>,  
9 Rokadiya S<sup>1</sup>, Kall M<sup>1</sup>, Zambon M<sup>1</sup>, Ramsay M<sup>1</sup>, Brooks T<sup>1</sup>, SIREN Study Group, Brown CS<sup>1</sup>,  
10 Chand MA<sup>1</sup>, & Hopkins S<sup>1,2</sup>.

11 <sup>\*</sup>*Authors contributed equally to this work.*

12 <sup>‡</sup>*Corresponding author*

13 *Further information from Chief Investigator: Susan Hopkins Susan.Hopkins@phe.gov.uk*

14 SIREN study group<sup>∞</sup> contributors listed below

15 Author affiliations:

16 1 COVID-19 response, Public Health England, UK;

17 2 The National Institute for Health Research Health Protection Research Unit in Healthcare  
18 Associated Infections and Antimicrobial Resistance at the University of Oxford, Oxford, UK.

19  
20 Acknowledgements: thanks to all staff supporting study delivery at participating sites and to  
21 all participants for their ongoing commitment and contributions to this study. Thank you to all  
22 staff undertaking COVID-19 testing within PHE Reference Microbiology.

## FINAL MANUSCRIPT

### 24 **ABSTRACT**

25 Background: There is an urgent need to better understand whether individuals who have  
26 recovered from COVID-19 are protected from future SARS-CoV-2 infection.

27 Methods: A large multi-centre prospective cohort was recruited from publicly funded hospital  
28 staff in the UK. Participants attended regular SARS-CoV-2 PCR and antibody testing (every  
29 2-4 weeks) and completed fortnightly questionnaires on symptoms and exposures. At  
30 enrolment, participants were assigned to either the positive cohort (antibody positive or prior  
31 PCR/antibody test positive) or negative cohort (antibody negative, not previously known to  
32 be PCR/antibody positive). Potential reinfections were clinically reviewed and classified  
33 according to case definitions (confirmed, probable, possible (subdivided by symptom-status))  
34 depending on hierarchy of evidence. Individuals in the primary infection were excluded from  
35 this analysis if infection was confirmed by antibody only. Reinfection rates in the positive  
36 cohort were compared against new PCR positives in the negative cohort using a mixed  
37 effective multivariable logistic regression analysis.

38 Findings: Between 18 June and 09 November 2020, 44 reinfections (2 probable, 42  
39 possible) were detected in the baseline positive cohort of 6,614 participants, collectively  
40 contributing 1,339,078 days of follow-up. This compares with 318 new PCR positive  
41 infections and 94 antibody seroconversions in the negative cohort of 14,173 participants,  
42 contributing 1,868,646 days of follow-up. The incidence density per 100,000 person days  
43 between June and November 2020 was 3.3 reinfections in the positive cohort, compared  
44 with 22.4 new PCR confirmed infections in the negative cohort. The adjusted odds ratio was  
45 0.17 for all reinfections (95% CI 0.13-0.24) compared to PCR confirmed primary infections.  
46 The median interval between primary infection and reinfection was over 160 days.

47 Interpretation: A prior history of SARS-CoV-2 infection was associated with an 83% lower  
48 risk of infection, with median protective effect observed five months following primary  
49 infection. This is the minimum likely effect as seroconversions were not included.

FINAL MANUSCRIPT

50 Funding: Department of Health and Social Care and Public Health England, with  
51 contributions from the Scottish, Welsh and Northern Irish governments.

52

53

54

55

## FINAL MANUSCRIPT

### 56 1. **BACKGROUND**

57 There is an urgent need to better understand whether individuals who have recovered from  
58 COVID-19 are protected from future SARS-CoV-2 infection.<sup>1,2</sup> Establishing whether  
59 reinfection is typically symptomatic or asymptomatic, whether reinfected individuals are  
60 infectious to others and the expected duration of SARS-CoV-2 immunity from infection and  
61 vaccination are key components of determining the future dynamics of SARS-CoV-2  
62 circulation.

63 Reinfections have been reported internationally since June 2020, although they remain  
64 uncommon.<sup>2-21</sup> Large longitudinal cohort studies with regular testing are needed to  
65 understand the rates of reinfection and their implications for policy by providing systematic  
66 epidemiological, virological, immunologic and clinical data.<sup>22</sup>

67 Over 90% of individuals infected with SARS-CoV-2 develop antibodies about one week after  
68 symptoms onset, persisting for at least three months.<sup>23,24</sup> High levels of neutralising  
69 antibodies targeting SARS-CoV-2 Spike protein offer considerable protection against SARS-  
70 CoV-2 reinfection, supported by data from common human coronaviruses and non-human  
71 primate models and vaccine studies.<sup>25-29</sup> Whilst the exact length of immunity conferred by  
72 natural infection is still unknown, titres of neutralising antibodies against SARS-CoV-2 spike  
73 protein were detectable for at least five months after primary infection.<sup>30</sup>

74 A few studies to date have reported that individuals with SARS-CoV-2 antibodies are at  
75 lower risk of clinical reinfection than antibody negative individuals.<sup>31-33</sup> However, given the  
76 relatively small size of some of these cohorts and the lack of systematic SARS-CoV-2  
77 molecular testing, the true population impact remains unknown.

78 The SARS-CoV-2 Immunity and Reinfection Evaluation (SIREN) Study is a large, national,  
79 multi-centre prospective cohort study of hospital healthcare workers across the National  
80 Health Service in the United Kingdom, investigating whether the presence of antibody to

## FINAL MANUSCRIPT

81 SARS-CoV-2 (anti-SARS-CoV-2) is associated with a reduction in the subsequent risk of  
82 symptomatic and asymptomatic reinfection over the next year.

83 This paper presents an interim analysis of the primary study objective, with data collected up  
84 to 24 November 2020.

85

## 86 **2. METHODS**

### 87 **Study design and setting**

88 The SIREN study is a prospective cohort study among staff working in the publicly funded  
89 hospitals (the National Health Service (NHS)) across the UK. The SIREN protocol is  
90 described elsewhere.<sup>34</sup>

### 91 **Participants**

92 All healthcare workers, support staff and administrative staff working at hospital sites  
93 participating in SIREN, who could provide informed consent and anticipated remaining  
94 engaged in follow-up for 12 months were eligible to join SIREN. Participants were excluded  
95 from this analysis if they had no linked antibody or PCR data, no PCR tests after enrolment  
96 or enrolled after 9 November 2020.

### 97 **Variables**

98 Questionnaires on symptoms and exposures were sent electronically at baseline and every  
99 two weeks (Supplementary appendix); SARS-CoV-2 antibody (using the Roche cobas® or  
100 Abbott immunoassay®) and Nucleic Acid Amplification Testing (NAAT), generally RT-PCR,  
101 was conducted at enrolment and at regular intervals (PCR every two weeks, antibody every  
102 four weeks). Testing was performed in the clinical laboratory at the site of participant  
103 enrolment, using locally validated testing platforms.

### 104 **Cohort assignment at baseline**

## FINAL MANUSCRIPT

105 Participants were assigned to the positive cohort if they met one of the following criteria:  
106 antibody positive on enrolment or antibody positive from prior clinical laboratory sample, with  
107 or without prior PCR positive; antibody negative on enrolment with prior antibody positive,  
108 with or without prior PCR positive; antibody negative on enrolment with a PCR positive result  
109 prior to enrolment. Participants were assigned to the negative cohort if they had a negative  
110 antibody test and no documented positive PCR test. Those in the negative cohort moved to  
111 the positive cohort 21 days following a PCR positive test result or at the time of antibody  
112 seroconversion with no positive PCR test.

### 113 **Reinfection case definitions**

114 The SIREN case definitions for reinfections have been described elsewhere and range from  
115 confirmed to possible dependent on the strength of serological, genetic and virological  
116 evidence.<sup>36</sup> A possible reinfection was defined as a participant with two PCR positive  
117 samples 90 or more days apart (based on previous national surveillance analysis)<sup>36</sup> with  
118 available genomic data or an antibody positive participant with a new positive PCR at least  
119 four weeks after the first antibody positive result. A probable case additionally required  
120 supportive quantitative serological data and/or supportive viral genomic data from  
121 confirmatory samples.

122 We subcategorised possible reinfections by symptom status to highlight those with stronger  
123 evidence and provide comparability with definitions used elsewhere.<sup>28,31</sup> Participants  
124 reporting any of cough, fever, anosmia or dysgeusia 14 days before or after their positive  
125 PCR result were defined as having 'COVID-19 symptoms' and 'other potential COVID-19  
126 symptoms' if reporting any other recognised symptoms listed in Appendix A.<sup>34,35</sup>

### 127 **Data sources/measurement**

128 Individuals consented at enrolment for all their recorded results from the Public Health  
129 England (PHE) national laboratory testing surveillance system from 1<sup>st</sup> February 2020 to be  
130 included in this analysis.

## FINAL MANUSCRIPT

### 131 **Data management and linkage**

132 Personal identifiable information collected via the enrolment survey, completed by all SIREN  
133 participants, was used to match participants to their NHS numbers, which were obtained  
134 through the Demographic Batch Service (DBS). This information (forename, surname, date  
135 of birth and NHS number) was used to link the SIREN survey data (enrolment and follow-up  
136 survey) to results from all laboratory investigations (PCR and antibody data) held at PHE.  
137 Automated data linkage was developed and run daily to extract new test results. All SIREN  
138 data (survey and laboratory extracts) were sorted and matched in the SIREN SQL database.  
139 Data were extracted from all sources on 24 November 2020.

140

### 141 **Detection of potential reinfections**

142 An SQL query was run on the SIREN database daily, to identify any participants who  
143 'flagged' as a potential reinfection. This included participants who had two positive PCR  
144 tests 90 days apart or antibody positive participants with a PCR positive test four weeks after  
145 their first antibody positive date. In addition, sites were advised to report potential  
146 reinfections.

147

### 148 **Bias**

149 Data were collected on potential confounders, including site and participant demographics to  
150 permit adjustment in analysis. Questionnaires were piloted and formatted to reduce  
151 misclassification bias. Recall bias was limited once enrolled by asking participants to  
152 complete surveys two weekly for exposures and symptoms. Verification that sites were using  
153 validated testing platforms and standardised criteria for reporting into SGSS was obtained  
154 during site initiation.

### 155 **Study size**

## FINAL MANUSCRIPT

156 Recruitment will continue until 31 March 2021, recruiting up to 100,000 participants. The  
157 study was originally powered to detect a difference in rate of infection between cohorts with  
158 a sample size of 10,000 (25% estimated to be antibody positive at baseline), cumulative  
159 incidence of 2% and immune efficacy of at least 50%.<sup>34</sup> The interim analysis was conducted  
160 as the cumulative incidence in the total cohort reached 2%.

### 161 **Quantitative variables: Person time at risk**

162 Data was censored on 24 November 2020, with the following cohorts assigned.

- 163 a) Cohort susceptible to primary infection: From first antibody negative date or first PCR  
164 positive date or seroconversion (if no PCR positive reported prior to seroconversion);  
165 or if neither of these occurred, to censor date.
- 166 b) Cohort with prior infection: the earliest date for prior infection was taken as  
167 whichever is first of the PCR positive result, onset of symptoms if there was no PCR  
168 positive, or if neither is available the first positive antibody test.

### 169 **Statistical methods**

170 The cohort was described by their baseline cohort allocation. Participants with PCR positive  
171 results in both negative and positive cohorts, were described in more detail. Cumulative  
172 incidence, using the total number of participants in each cohort, and incidence density using  
173 the total person time at risk was calculated for both cohorts and sub-categories and plotted  
174 over time using PCR confirmation only. A mixed effects logistic regression analysis was  
175 used to estimate odd ratios (OR) to measure the association between the exposure  
176 (cohort allocation) and the binary outcome (PCR test result). The entry date used in this  
177 analysis for all participants was the earliest antibody test. All PCR tests after the entry date  
178 have been used, except PCR tests within 21 days of a positive PCR result. To account for  
179 temporal changes in the background risk of infection, all tests were allocated to the calendar  
180 week of the test date. These were categorised into nine groups; <week 31, then two-week  
181 groups up to the final category of >week 44, allowing incidence over time to vary in a



## FINAL MANUSCRIPT

182 stepwise constant manner. Study site was fitted as a random effect to account for the  
183 longitudinal nature of the study data, with age group, gender, ethnicity, staff group, and  
184 region fitted as non-time varying fixed effects to account for their possible confounding  
185 effect.<sup>37</sup> Analysis was conducted in STATA v15.1 (College Station, TX: StataCorp LLC).

### 186 **3. RESULTS**

187 From 18 June to 09 November 2020, 20,787 enrolled participants, with linked data on  
188 antibody and PCR testing, were included in this analysis (figure 1). The baseline cohorts  
189 assigned 6,614 (32%) to the positive cohort and 14,173 (68%) to the negative cohort. A full  
190 description of the SIREN cohort and baseline risk factors for antibody positivity is published  
191 separately.<sup>35</sup> Table 1 describes the SIREN participants by their baseline cohort assignment;  
192 in summary the cohort was predominately female (n=17,487; 84%), white (n=18,304; 88%),  
193 middle-aged (median age 45.9, interquartile range 35.8-53.6) and from clinical occupations  
194 with representation from all English regions and two-thirds of acute hospital trusts.

195 The cohort had 129,189 PCR tests (17,538 before SIREN enrolment and 111,651 after  
196 enrolment) and 91,165 antibody tests (13,867 before SIREN enrolment and 77,298 after  
197 enrolment); median (and interquartile range) number of post enrolment PCR and antibody  
198 tests were 5 (3-7) 3 (2-5) respectively.

199 Figure 2 describes the weekly total of new PCR positives (primary infection only) in SIREN  
200 participants between March and November 2020 by baseline cohort assignment. It  
201 demonstrates that PCR positivity in the positive cohort peaked in the first week of April in the  
202 negative cohort was in the last week of October 2020.

203 By 24 November 2020, 409 new infections were detected in the negative cohort: 318 were  
204 new PCR positive infections; 249 (79%) of these cases were symptomatic at infection, 196  
205 (62%) with typical COVID-19 symptoms, and 53 (17%) with other symptoms; 40 (12%) were  
206 asymptomatic and 28 (9%) did not complete a questionnaire at the time of their symptoms;

FINAL MANUSCRIPT

207 94 were seroconversions in participants without a positive PCR test; these are not included  
208 in this interim analysis.

209 Forty-four reinfections were identified, 15 (34%) were symptomatic: two defined as probable  
210 (described in detail elsewhere<sup>36</sup>), both symptomatic, and 42 possible; 13 symptomatic, two  
211 (23%) of whom reported typical COVID-19 symptoms. Forty (both probable and 38 possible)  
212 reinfections were antibody positive at enrolment; three had previously positive antibody tests  
213 but two were antibody negative and one indeterminate on enrolment; and one individual  
214 remained antibody negative but reported COVID-19 symptoms and a documented PCR  
215 positive status in April 2020. Twenty-one (47.7%)(50%) of these individuals had historic PCR  
216 positives from their primary infection, of whom 19 reported COVID-19 symptoms and two  
217 other symptoms within 14 days of their positive test. Fourteen (31.8%) individuals (including  
218 both probable cases) reported a history of COVID-19-like illness but did not have a PCR test  
219 due to lack of availability at the time of their primary illness; 13 (92.9%) with typical COVID-  
220 19 symptoms and one with other symptoms. Nine (20.5%) reported no history of any  
221 potential COVID-19 related symptoms.

222 For the 32 reinfections providing a history of COVID-19 symptoms, used as a proxy to  
223 estimate the date of their primary infection, the median interval between primary infection  
224 and reinfection beyond 90 days was 172 days (90-227) and for the 21 reinfections with a  
225 historic PCR positive test before enrolment, the median interval between the historic PCR  
226 positive date and the reinfection PCR positive date was 162 days (95-223).

227 Between June and November 2020, the cumulative incidence of probable, symptomatic  
228 possible and all reinfections in the positive cohort between June and November 2020 was  
229 0.3, 2.3 and 6.7 per 1,000 participants respectively and incidence of symptomatic and all  
230 new PCR infections in the negative cohort was 17.6 and 22.4 per 1,000 participants  
231 respectively (Table 3). The incidence density per 100,000 days of follow up between June  
232 and November 2020 in the positive cohort was 3 .3 reinfections and in the negative cohort  
233 was 17.0 new PCR positive infections per 100,000 days of follow-up. Figure 3 describes the

## FINAL MANUSCRIPT

234 cumulative incidence of new episode PCR positive tests per cohort demonstrating the higher  
235 cumulative incidence in the negative cohort reaching 20 per 1000 compared 5 per 1000  
236 cases in the positive cohort.

237 We estimated the relative odds for reinfections in the positive cohort, with separate analyses  
238 for each reinfection definition described above, compared to new PCR positive infections in  
239 our negative cohort between SIREN enrolment and 24 November 2020 (Table 4, annex B  
240 Tables Bi.-Biii).

241 Restricting reinfections to probable reinfections only, we estimated that between June and  
242 November 2020, participants in the positive cohort had 99% lower odds of probable  
243 reinfection, adjusted OR (aOR) 0.01 (95% CI 0.00-0.03). Restricting reinfections to those  
244 who were symptomatic we estimated participants in the positive cohort had 95% lower odds  
245 of reinfection, aOR 0.08 (95% CI 0.05-0.13). Using our most sensitive definition of  
246 reinfections, including all those who were possible or probable the adjusted odds ratio was  
247 0.17 (95% CI 0.13-0.24).

248 The two approaches to account for temporal changes in incidence provided very similar  
249 estimates, we have opted to present results from the model with calendar time categorised.  
250 This also shows how the probability of exposure to an infectious individual has changed over  
251 time in a piecewise constant manner, increasing over time as incidence of new infections in  
252 the population increased in September and October 2020.

253

## 254 **4. DISCUSSION**

255 We have presented the interim findings after five months of follow-up from the SIREN study,  
256 a unique large-scale multi-centre prospective cohort study of healthcare staff undergoing  
257 frequent asymptomatic testing, powered to detect and characterise reinfections and estimate  
258 the protective effect of SARS-CoV-2 antibodies.

FINAL MANUSCRIPT

259 We have detected two probable reinfections (both symptomatic with high viral loads,  
260 genome sequencing demonstrating phylogenetic relatedness to concurrently circulating  
261 strains, and a boosted antibody response), which have been characterised and reported  
262 separately,<sup>36</sup> and 42 possible reinfections in our positive cohort. This compares with 318  
263 new PCR positive infections, 249 of whom were symptomatic, 78% with typical COVID-19  
264 symptoms, in our negative cohort. Using a symptomatic case definition aligned with positive  
265 PCR results, previous infection reduced the odds of infection by at least 90% (aOR 0.06 with  
266 95%CI of 0.03 to 0.09) and even when we included all possible and probable reinfections  
267 reduced the odds of reinfection by at least 75% [aOR 0.17 (95% CI 0.13-0.24)]

268 We believe this is the minimum likely impact as the curve in the positive cohort was gradual  
269 throughout, indicating some of these potential reinfections were likely residual RNA detection  
270 at low population prevalence rather than true reinfections. In the negative cohort the gradient  
271 was gradual up to around day 100 and has then accelerated, broadly coinciding with the  
272 period when community prevalence increased rapidly.<sup>38</sup> In addition, we did not include 94  
273 seroconversions in the negative cohort, as these seroconversions were not detected by PCR  
274 and we cannot currently say whether a similar rate of undetected infections occurred in the  
275 positive cohort. None of the reinfections we have identified are confirmed by our stringent  
276 case definitions; most we only consider possible and are undergoing further serological  
277 investigation. Investigations have been restricted by the limited availability of data and  
278 samples from historic infections, with most swabs discarded without sequencing, preventing  
279 the genomic comparison between infection episodes required to confirm a reinfection. This  
280 highlights the importance of SIREN, through which we are ensuring the data collection and  
281 characterisation of new infections, to build a stronger base to investigate and confirm future  
282 reinfections. Our use of hierarchical case definitions identifies cases with stronger evidence,  
283 and allows us present the range of potential reinfection scenarios.

284 Another limitation is measurement error capturing the primary infection onset date for  
285 positive cohort participants without a PCR positive test associated with their primary

FINAL MANUSCRIPT

286 episode. This introduces imprecision into both our person time at risk, and consequently  
287 reinfection rates, and our estimated intervals between primary infection episodes and  
288 reinfections. For those who were symptomatic in their primary episode we have used their  
289 self-reported COVID-19 symptom onset date as a proxy, which may be subject to recall bias.  
290 We have introduced validation rules here to reduce this, excluding onset dates before March  
291 2020. However, for participants with asymptomatic or non-COVID-19 symptomatic primary  
292 infections, we are reliant on using their first antibody positive date. We are therefore not  
293 capturing all the time they were susceptible to reinfection, reducing our overall follow-up time  
294 for this cohort, and thus inflating our reinfection rates and reducing our intervals between  
295 infection episodes.

296 As the cohort assignment has been determined by testing at SIREN sites, which use a range  
297 of testing platforms and assays, there is the possibility of misclassification bias. We have  
298 included participants in the positive cohort who had a prior positive PCR test, irrespective of  
299 their antibody status. Some of those PCR results, especially early in the epidemic, may  
300 have been false positives or laboratory contamination episodes, particularly given Ct/RLU  
301 values are not available. We aim to retest all baseline serum samples within PHE, using  
302 both S and N target assays in order to give each participant a validated quantitative baseline  
303 antibody result. This will inform future analyses and may lead to changes to the cohort  
304 assignment presented.

305 Finally, this interval analysis is presented prior to the widespread emergence and spread of  
306 the B.1.1.7 lineage (VOC202012/01) with multiple non-synonymous spike mutations including  
307 N501Y; the impact of this lineage on future protection remains undetermined and will be  
308 evaluated.

309 Our results are consistent with the findings from other smaller studies of decreased  
310 incidence of PCR positivity in antibody positive individuals.<sup>31,39</sup> Another prospective cohort of  
311 healthcare workers recently reported the incidence of new positive PCR-confirmed infections  
312 to be lower among seropositive than seronegative participants (n=3/1,246 vs. n=165/11,052,

FINAL MANUSCRIPT

313 an incidence density of 2.1 and 8.6/100,000 days at risk respectively).<sup>31</sup> None of the three  
314 potential reinfections were symptomatic.

315 The recent SARS-CoV-2 vaccination trials have typically investigated protection from  
316 symptomatic infection. The ChAdOx1 trial reported protection against symptomatic infection  
317 of between 70.4% and 90%, and the BNT162b2 vaccine phase 3 results report 95%  
318 protection over two and three months of follow-up respectively.<sup>28,29</sup> Our findings, after a  
319 longer period of follow-up, of 94% lower odds of symptomatic infection, demonstrate  
320 equivalent, or higher protection from natural infection, both for symptomatic and  
321 asymptomatic infection.

322 After five months of follow-up, this large observational study has found that prior SARS-CoV-  
323 2 infection protects most individuals against reinfection for at least five months. We have  
324 identified and investigated more potential reinfections than reported in the global literature to  
325 date, supporting the value of large prospective cohort studies such as SIREN. This study  
326 supports the hypothesis that primary infection with SARS-CoV-2 provides a high degree of  
327 immunity to repeat infection in the short to medium term; with similar levels of prevention of  
328 symptomatic infection as current licensed vaccines for working age adults. Primary infection  
329 also reduces the risk of asymptomatic infection and thus onward transmission; this is  
330 particularly important in the healthcare was considered as a potential driver for ongoing  
331 community transmission in Wave 1 in the UK.<sup>40</sup> This increases the likelihood that this may  
332 also be attainable by vaccine induced immunity. Further detailed studies on the longevity of  
333 antibody responses, assessment of reinfection rates under the challenge of the new lineage,  
334 and the impact of all COVID-19 vaccines introduced in the UK are underway in this cohort.

335

336

## FINAL MANUSCRIPT

337

### 338 **5. Funding**

339 The study is funded by the United Kingdom's Department of Health and Social Care and  
340 Public Health England, with contributions from the Scottish, Welsh and Northern Irish  
341 governments. Funding is also provided by the National Institute for Health Research (NIHR)  
342 as an Urgent Public Health Priority Study (UPHP). SH, VH are supported by the National  
343 Institute for Health Research Health Protection Research Unit (NIHR HPRU) in Healthcare  
344 Associated Infections and Antimicrobial Resistance at the University of Oxford in partnership  
345 with Public Health England (PHE) (NIHR200915).

346

### 347 **6. Trial Registration**

348 IRAS ID 284460, HRA and Health and Care Research Wales approval granted 22 May  
349 2020. Trial ID: ISRCTN11041050.

350

### 351 **7. REFERENCES**

- 352 1. European Centre for Disease Prevention and Control. Reinfection with SARS-CoV:  
353 considerations for public health response. ECDC 2020. Available at  
354 [https://www.ecdc.europa.eu/sites/default/files/documents/Re-infection-and-viral-](https://www.ecdc.europa.eu/sites/default/files/documents/Re-infection-and-viral-shedding-threat-assessment-brief.pdf)  
355 [shedding-threat-assessment-brief.pdf](https://www.ecdc.europa.eu/sites/default/files/documents/Re-infection-and-viral-shedding-threat-assessment-brief.pdf) (accessed 19th December 2020).
- 356 2. Iwasaki A. What reinfections mean for COVID-19. *Lancet Infect Dis* 2020. doi:  
357 10.1016/S1473-3099(20)30783-0.
- 358 3. Colson P, Finaud M, Levy N et al. Evidence of SARS-CoV-2 re-infection with a  
359 different genotype. *J Infect* 2020; Nov 15; S0163-4453(20)30706-4. doi:  
360 10.1016/j.jinf.2020.11.011.
- 361 4. Selhorst P, Van Ierssel S, Michiels J et al. Symptomatic SARS-CoV-2 re-infection of  
362 a health care worker in a Belgian nosocomial outbreak despite primary neutralizing

FINAL MANUSCRIPT

- 363 antibody response. Preprint available at  
364 <https://www.medrxiv.org/content/10.1101/2020.11.05.20225052v1> (2020).
- 365 5. Tillett RL, Sevinsky JR, Hartley PD et al. Genomic evidence for reinfection with  
366 SARS-CoV-2: a case study. *Lancet Infect Dis* 2020; Oct 12; S1473-3099(20)30764-  
367 7. doi: 10.1016/S1473-3099(20)30764-7.
- 368 6. Abu-Raddad LJ, Chemaitelly H, Malek JA et al. Assessment of the risk of SARS-  
369 CoV-2 reinfection in an intense re-exposure setting. Preprint available  
370 at <https://www.medrxiv.org/content/10.1101/2020.08.24.20179457v2> (2020).
- 371 7. Bongiovanni M. COVID-19 re-infection in an healthcare worker. *J Med Virol* 2020;  
372 Sep 29; 10.1002/jmv.26565. doi: 10.1002/jmv.26565.
- 373 8. Goldman JD, Wang K, Roltgen K et al. Reinfection with SARS-CoV-2 and Failure of  
374 Humoral Immunity: a case report. Preprint available at:  
375 <https://www.medrxiv.org/content/10.1101/2020.09.22.20192443v1> (2020).
- 376 9. Gupta V, Bhojar RC, Jain A et al. Asymptomatic reinfection in two healthcare  
377 workers from India with genetically distinct SARS-CoV-2. *Clin Infect Dis* 2020;  
378 Sep 23; ciaa1451. doi: 10.1093/cid/ciaa1451.
- 379 10. Larson D, Brodniak SI, Voegtly LJ et al. A Case of Early Re-infection with SARS-  
380 CoV-2. *Clin Infect Dis* 2020; Sep 19; ciaa1436. doi: 10.1093/cid/ciaa1436.
- 381 11. Mulder M, van der Vegt DSJM, Munnink BBO et al. Reinfection of SARS-CoV-2 in an  
382 immunocompromised patient: a case report. *Clin Infect Dis* 2020; Oct 9;  
383 ciaa1538. doi: 10.1093/cid/ciaa1538.
- 384 12. Munoz Mendoza J and Alcaide ML. COVID-19 in a patient with end-stage renal  
385 disease on chronic in-center hemodialysis after evidence of SARS-CoV-2 IgG  
386 antibodies. Reinfection or inaccuracy of antibody testing. *IDCases* 2020;  
387 22:e00943. doi: 10.1016/j.idcr.2020.e00943.
- 388 13. Prado-Vivar B, Becerra-Wong M, Guadalupe JJ et al. COVID-19 Re-Infection by a  
389 Phylogenetically Distinct SARS-CoV-2 Variant, First Confirmed Event in South



FINAL MANUSCRIPT

- 390 America. Preprint available at <https://ssrn.com/abstract=3686174> and  
391 <http://dx.doi.org/10.2139/ssrn.3686174> (2020).
- 392 14. To KK, Hung IF, Ip JD et al. COVID-19 re-infection by a phylogenetically distinct  
393 SARS-coronavirus-2 strain confirmed by whole genome sequencing. *Clin Infect Dis*  
394 2020; Aug 25; ciaa1275. doi: 10.1093/cid/ciaa1275.
- 395 15. Van Elslande J, Vermeersch P, Vandervoort K et al. Symptomatic SARS-CoV-2  
396 reinfection by a phylogenetically distinct strain. *Clin Infect Dis*, 2020; Sep 5;  
397 ciaa1330. doi: 10.1093/cid/ciaa1330.
- 398 16. Zhang K, Lau JY, Yang L et al. SARS-CoV-2 reinfection in two patients who have  
399 recovered from COVID-19. *Precis Clin Med* 2020; 0(0); 1–2. doi:  
400 10.1093/pcmedi/pbaa031.
- 401 17. Bonifácio LP, Pereira APS, de Almeida E Araújo DC et al. Are SARS-CoV-2  
402 reinfection and Covid-19 recurrence possible? a case report from Brazil. *Rev Soc*  
403 *Bras Med Trop* 2020; Sep 18;53:e20200619. doi: 10.1590/0037-8682-0619-2020.
- 404 18. Nachmias V, Fusman R, Mann S et al. The first case of documented Covid-19  
405 reinfection in Israel. *IDCases* 2020; 22:e00970. doi: 10.1016/j.idcr.2020.e00970.
- 406 19. Ozaras R, Ozdogru I and Yilmaz AA. Coronavirus disease 2019 re-infection: first  
407 report from Turkey. *New Microbes New Infect* 2020; Oct 3; 38:100774. doi:  
408 10.1016/j.nmni.2020.100774.
- 409 20. Selvaraj V, Herman K and Dapaah-Afryiye. Severe, Symptomatic Reinfection in a  
410 Patient with COVID-19. *R I Med J (2013)* 2020; Nov 9; 103(10): 24-26.
- 411 21. Tomassini S, Kotecha D, Bird PW et al. Setting the criteria for SARS-CoV-2  
412 reinfection - six possible cases. *J Infect* 2020; Aug 12; S0163-4453(20)30546-6. doi:  
413 10.1016/j.jinf.2020.08.011.
- 414 22. Overbaugh, J. Understanding protection from SARS-CoV-2 by studying reinfection.  
415 *Nat Med* 2020; 26: 1680–1681. doi: [org/10.1038/s41591-020-1121-z](https://doi.org/10.1038/s41591-020-1121-z).
- 416 23. Wajnberg A, Amanat F, Firpo A, Altman D, Bailey M, Mansour M, McMahon M,  
417 Meade P, Mendu DR, Muellers K, Stadlbauer D. SARS-CoV-2 infection induces

FINAL MANUSCRIPT

- 418 robust, neutralizing antibody responses that are stable for at least three months.
- 419 MedRxiv. 2020 Jan 1.
- 420 24. Gudbjartsson DF, Helgason A, Jonsson H, Magnusson OT, Melsted P, Norddahl GL,  
421 Saemundsdottir J, Sigurdsson A, Sulem P, Agustsdottir AB, Eiriksdottir B. Spread of  
422 SARS-CoV-2 in the Icelandic population. *New England Journal of Medicine*. 2020  
423 Apr 14.
- 424 25. Muecksch F, Wise H, Batchelor B, Squires M, Semple E, Richardson C, McGuire J,  
425 Clearly S, Furrie E, Greig N, Hay G. Longitudinal analysis of serology and  
426 neutralizing antibody levels in COVID19 convalescents. *Journal of Infectious  
427 Diseases*. 2020 Nov 3.
- 428 26. Huang AT, Garcia-Carreras B, Hitchings MD, Yang B, Katzelnick LC, Rattigan SM,  
429 Borgert BA, Moreno CA, Solomon BD, Rodriguez-Barraquer I, Lessler J. A  
430 systematic review of antibody mediated immunity to coronaviruses: antibody kinetics,  
431 correlates of protection, and association of antibody responses with severity of  
432 disease. medRxiv. 2020 Apr 17.
- 433 27. Yu J, Tostanoski LH, Peter L, Mercado NB, McMahan K, Mahrokhian SH, Nkolola  
434 JP, Liu J, Li Z, Chandrashekar A, Martinez DR. DNA vaccine protection against  
435 SARS-CoV-2 in rhesus macaques. *Science*. 2020 May 20.
- 436 28. Voysey M, Clemens SAC, Madhi SA et al. Safety and efficacy of the ChAdOx1  
437 nCoV-19 vaccine (AZD1222) against SARS-CoV-2: an interim analysis of four  
438 randomised controlled trials in Brazil, South Africa, and the UK. *Lancet* 2020 Dec 08  
439 doi: [https://doi.org/10.1016/S0140-6736\(20\)32661-1](https://doi.org/10.1016/S0140-6736(20)32661-1)
- 440 29. Polack FP, Thomas SJ, Kitchin N, Absalon J, Gurtman A, Lockhart S, Perez JL, Marc  
441 GP, Moreira ED, Zerbini C, Bailey R, Swanson KA et al. Safety and Efficacy of the  
442 BNT162b2 mRNA Covid-19 Vaccine. *New England Journal of Medicine*. 2020 Dec  
443 10; doi: DOI: 10.1056/NEJMoa2034577

FINAL MANUSCRIPT

- 444 30. Wajnberg A, Amanat F, Firpo A, Altman DR, Bailey MJ, Mansour M, McMahon M,  
445 Meade P, Mendu DR, Muellers K, Stadlbauer D. Robust neutralizing antibodies to  
446 SARS-CoV-2 infection persist for months. *Science*. 2020 Dec 4;370(6521):1227-30.
- 447 31. Lumley SF, O'Donnell D, Stoesser NE, Matthews PC, Howarth A, Hatch SB,  
448 Marsden BD, Cox S, James T, Warren F, Peck LJ. Antibodies to SARS-CoV-2 are  
449 associated with protection against reinfection. *medRxiv*. 2020 Jan 1.
- 450 32. Addetia A, Crawford KH, Dingens A, Zhu H, Roychoudhury P, Huang ML, Jerome  
451 KR, Bloom JD, Greninger AL. Neutralizing antibodies correlate with protection from  
452 SARS-CoV-2 in humans during a fishery vessel outbreak with a high attack rate.  
453 *Journal of Clinical Microbiology*. 2020 Oct 21;58(11).
- 454 33. Houlihan CF, Vora N, Byrne T, Lewer D, Kelly G, Heaney J, Gandhi S, Spyer MJ,  
455 Beale R, Cherepanov P, Moore D. Pandemic peak SARS-CoV-2 infection and  
456 seroconversion rates in London frontline health-care workers. *The Lancet*. 2020 Jul  
457 25;396(10246):e6-7.
- 458 34. Wallace S; Hall V; Charlett A; Kirwan PD; Cole MJ; Shrotri M; Rokadiya S; Oguti B;  
459 Vusirikala A; Zambon M; Brooks T; Ramsay M; Brown CS; Chand MA; Hopkins S.  
460 SIREN protocol: Impact of detectable anti-SARS-CoV-2 on the subsequent incidence  
461 of COVID-19 in 100,000 healthcare workers: do antibody positive healthcare workers  
462 have less reinfection than antibody negative healthcare workers? Preprint available  
463 at doi: <https://doi.org/10.1101/2020.12.15.20247981>
- 464 35. Foulkes S, Hall V, Atti A, Kirwan PD, Vusirikala A, Kall M, Simmons R, Wellington E,  
465 Charlett A, Monk EJM, Cole MJ, Oguti B, Wallace S, Shrotri M, Rokadiya S, Zambon  
466 M, Ramsay M, Brooks T, SIREN Study Group, Brown CS, Chand MA, & Hopkins S.  
467 Risk factors for SARS-CoV-2 antibody positivity in healthcare workers, a multicentre  
468 cross-sectional survey of participants at enrolment into SIREN; England June –  
469 November 2020. (in press)
- 470 36. Atti A, Monk EJM, Hall V, Cole MJ, Islam J, Groves N, Simmons R, Foulkes S,  
471 Charlett A, Gallagher, Campbell, Wallace S, Shrotri M, Oguti B, Rokadiya S, Haldeos

FINAL MANUSCRIPT

- 472 A, Mirfenderesky M, Robson G, Favager C, Higgins M, Nastouli E, Brown K, Zambon  
473 M, Brookes T, Brown CS, Chand MA & Hopkins S. SARS-CoV-2 in the United  
474 Kingdom: establishing national surveillance for reinfections and the first two  
475 reinfection cases. (in press)
- 476 37. Diggle, P.J., Heagerty, P., Liang, K-Y and Zeger, S.L. (2002). Analysis of  
477 Longitudinal Data (second edition). Oxford: Oxford University Press.
- 478 38. Office for National Statistics (ONS) Coronavirus (COVID-19) Infection Survey, UK: 24  
479 December 2020. Release date 08 January 2021.  
480 [https://www.ons.gov.uk/peoplepopulationandcommunity/healthandsocialcare/conditio](https://www.ons.gov.uk/peoplepopulationandcommunity/healthandsocialcare/conditionsanddiseases/bulletins/coronaviruscovid19infectionsurveypilot/8january2021)  
481 [nsanddiseases/bulletins/coronaviruscovid19infectionsurveypilot/8january2021](https://www.ons.gov.uk/peoplepopulationandcommunity/healthandsocialcare/conditionsanddiseases/bulletins/coronaviruscovid19infectionsurveypilot/8january2021)
- 482 39. Addetia A, Crawford KHD, Dingens A, Zhu H, Roychoudhury P, Huang ML, Jerome  
483 KJ, Bloom JD, Greninger AL. Neutralizing Antibodies Correlate with Protection from  
484 SARS-CoV-2 in Humans during a Fishery Vessel Outbreak with a High Attack Rate.  
485 Journal of Clinical Microbiology. Vol 58. Issue 11. November 2020.  
486 Doi: 10.1128/JCM.02107-20
- 487 40. Scientific Advisory Committee on Emergencies (SAGE) Minutes from Sixty-third  
488 SAGE meeting on Covid-19, 22nd October 2020.  
489 [https://assets.publishing.service.gov.uk/government/uploads/system/uploads/attachm](https://assets.publishing.service.gov.uk/government/uploads/system/uploads/attachment_data/file/935103/sage-63-meeting-covid-19-s0842.pdf)  
490 [ent\\_data/file/935103/sage-63-meeting-covid-19-s0842.pdf](https://assets.publishing.service.gov.uk/government/uploads/system/uploads/attachment_data/file/935103/sage-63-meeting-covid-19-s0842.pdf)  
491

FINAL MANUSCRIPT

492 **TABLES**

493 **Table 1: Demographics of SIREN participants by baseline cohort allocation,**  
 494 **participants enrolled 18 June to 09 November 2020 (n=20,787)**

| Characteristics               | Positive cohort    | Negative cohort     | All Participants     |
|-------------------------------|--------------------|---------------------|----------------------|
|                               | n (%)              | n (%)               | n (%)                |
| <b>Gender</b>                 |                    |                     |                      |
| Female                        | 5452 (82.4)        | 12035 (84.9)        | 17487 (84.1)         |
| Male                          | 1152 (17.4)        | 2121 (15.0)         | 3273 (15.7)          |
| Other                         | 10 (0.2)           | 17 (0.1)            | 27 (0.1)             |
| <b>Age</b>                    |                    |                     |                      |
| Median [IQR]                  | 46 [35.1-54]       | 45.9 [36-53.9]      | 45.9 [35.8-53.6]     |
| Range                         | 18.6-78.4          | 18.6-84.3           | 18.6-84.3            |
| <b>Ethnicity</b>              |                    |                     |                      |
| White                         | 5607 (84.8)        | 12697 (89.6)        | 18304 (88.1)         |
| Mixed Race                    | 558 (8.4)          | 780 (5.5)           | 1338 (6.4)           |
| Asian                         | 188 (2.8)          | 226 (1.6)           | 414 (2.0)            |
| Black                         | 102 (1.5)          | 211 (1.5)           | 313 (1.5)            |
| Chinese                       | 111 (1.7)          | 161 (1.1)           | 272 (1.3)            |
| Other Ethnic Group            | 38 (0.6)           | 74 (0.5)            | 112 (0.5)            |
| Prefer not to say             | 10 (0.2)           | 24 (0.2)            | 34 (0.2)             |
| <b>Staff group</b>            |                    |                     |                      |
| Nursing/Healthcare Assistant  | 2964 (44.8)        | 5805 (41.0)         | 8769 (42.2)          |
| Administrative/Executive      | 885 (13.4)         | 2311 (16.3)         | 3196 (15.4)          |
| Doctor                        | 793 (12)           | 1423 (10)           | 2216 (10.7)          |
| Specialist staff              | 340 (5.1)          | 783 (5.5)           | 1123 (5.4)           |
| Healthcare Scientist          | 176 (2.7)          | 548 (3.9)           | 724 (3.5)            |
| Midwife                       | 163 (2.5)          | 379 (2.7)           | 542 (2.6)            |
| Pharmacist                    | 78 (1.2)           | 192 (1.4)           | 270 (1.3)            |
| Estates/Porters/Security      | 56 (0.8)           | 103 (0.7)           | 159 (0.8)            |
| Other                         | 1159 (17.5)        | 2629 (18.5)         | 3788 (18.2)          |
| <b>Medical conditions</b>     |                    |                     |                      |
| No medical conditions         | 4944 (74.8)        | 10590 (74.7)        | 15534 (74.7)         |
| One to two medical conditions | 1635 (24.7)        | 3512 (24.8)         | 5147 (24.8)          |
| Over two medical conditions   | 35 (0.5)           | 71 (0.5)            | 106 (0.5)            |
| <b>Region</b>                 |                    |                     |                      |
| South West                    | 1016 (15.4)        | 3762 (26.5)         | 4778 (23)            |
| North West                    | 1074 (16.2)        | 1730 (12.2)         | 2804 (13.5)          |
| London                        | 1031 (15.6)        | 1570 (11.1)         | 2601 (12.5)          |
| South East                    | 748 (11.3)         | 1685 (11.9)         | 2433 (11.7)          |
| East Midlands                 | 759 (11.5)         | 1586 (11.2)         | 2345 (11.3)          |
| East of England               | 553 (8.4)          | 1516 (10.7)         | 2069 (10)            |
| West Midlands                 | 710 (10.7)         | 977 (6.9)           | 1687 (8.1)           |
| Yorkshire and the Humber      | 541 (8.2)          | 1040 (7.3)          | 1581 (7.6)           |
| North East                    | 182 (2.8)          | 307 (2.2)           | 489 (2.4)            |
| <b>All Participants</b>       | <b>6614 (31.8)</b> | <b>14173 (68.2)</b> | <b>20787 (100.0)</b> |

**Table 2: Characteristics of reinfections and new infections detected in SIREN participants up to 24 November 2020, stratified by case definition (n=362)**

|                                                          | Positive cohort     |                                  |                                    | Negative cohort   |
|----------------------------------------------------------|---------------------|----------------------------------|------------------------------------|-------------------|
|                                                          | Probable<br>n (%)   | Symptomatic<br>possible<br>n (%) | All probable/<br>possible<br>n (%) | New PCR+<br>n (%) |
| <b>Gender</b>                                            |                     |                                  |                                    |                   |
| Female                                                   | 2 (100)             | 11 (84.6)                        | 36 (81.8)                          | 261 (82.1)        |
| Male                                                     | 0 (0)               | 2 (15.4)                         | 8 (18.2)                           | 56 (17.6)         |
| Other                                                    | 0 (0)               | 0 (0)                            | 0 (0)                              | 1 (0.3)           |
| <b>Age</b>                                               |                     |                                  |                                    |                   |
| Median (range)                                           | 41.5 (37-46)        | 46 (25-58)                       | 48.5 (23-63)                       | 45.3 (19-70)      |
| <b>Antibody status at baseline</b>                       |                     |                                  |                                    |                   |
| Positive                                                 | 2 (100)             | 12 (92.3)                        | 40 (90.9)                          | 0 (0)             |
| Negative                                                 | 0 (0)               | 1 (7.7)                          | 3 (6.8)                            | 310 (97.5)        |
| Indeterminate/not available                              | 0 (0)               | 0 (0)                            | 1 (2.3)                            | 8 (2.5)           |
| <b>Reinfection PCR semi quantitative values (CT/RLU)</b> |                     |                                  |                                    |                   |
| CT range (n)                                             | 21-24 (2)           | 13-37 (5)                        | 13-45 (16)                         | -                 |
| RLU range (n)                                            | -                   | 587-1193 (6)                     | 591-1260 (20)                      | -                 |
| <b>Symptom status +/-14 days reinfection PCR+</b>        |                     |                                  |                                    |                   |
| COVID-19 symptoms                                        | 1 (50)              | 3 (23.1)                         | 4 (9.1)                            | 196 (61.6)        |
| Any other symptoms                                       | 1 (50)              | 10 (76.9)                        | 11 (25)                            | 53 (16.7)         |
| No symptoms                                              | 0 (0)               | 0 (0)                            | 21 (47.7)                          | 40 (12.6)         |
| Not known                                                | 0 (0)               | 0 (0)                            | 8 (18.2)                           | 29 (9.1)          |
| <b>Time interval in days – median (range); n</b>         |                     |                                  |                                    |                   |
| Symptom onset first episode to reinfection PCR           | 212 (197-227);<br>2 | 166 (90-223); 10                 | 169 (90-227); 32                   | -                 |
| First positive PCR to reinfection PCR                    | -                   | 155 (95-201); 7                  | 162 (95-223); 21                   | -                 |
| First antibody positive to reinfection PCR               | 63 (62-64); 2       | 110 (35-136); 12                 | 101.5 (35-174); 42*                | -                 |
| <b>Total</b>                                             | <b>2</b>            | <b>13</b>                        | <b>44</b>                          | <b>318</b>        |

\*One participant never antibody positive, one participant first reported as antibody positive on the same date as reinfection PCR date.

**Table 3: Frequency of new infections and possible/probable reinfections by cohort, characterised by symptoms within 14 days (pre/post) of PCR positive date and exposures in preceding 14 days (n=362)**

|                                   | Positive cohort |                    |                            |                       |                       | Negative cohort |                    |                            |                       |                       |
|-----------------------------------|-----------------|--------------------|----------------------------|-----------------------|-----------------------|-----------------|--------------------|----------------------------|-----------------------|-----------------------|
|                                   | n               | Denominator        |                            | Incidence             |                       | n               | Denominator        |                            | Incidence             |                       |
|                                   |                 | Total participants | Person time at risk (days) | Cumulative (per 1000) | Density (per 100,000) |                 | Total participants | Person time at risk (days) | Cumulative (per 1000) | Density (per 100,000) |
| <b>Reinfections</b>               |                 |                    |                            |                       |                       | <b>New PCR</b>  |                    |                            |                       |                       |
| Probable                          | 2               | 6614               | 1,339,078                  | 0.3                   | 0.1                   | -               | -                  | -                          | -                     | -                     |
| Probable AND Symptomatic possible | 15              | 6614               | 1,339,078                  | 2.3                   | 1.1                   | 249             | 14,173             | 1,868,646                  | 17.6                  | 13.3                  |
| <b>All events</b>                 | <b>44</b>       | <b>6614</b>        | <b>1,339,078</b>           | <b>6.7</b>            | <b>3.3</b>            | <b>318</b>      | <b>14,173</b>      | <b>1,868,646</b>           | <b>22.4</b>           | <b>17.0</b>           |

**Table 4: Univariable and multivariable analysis of risk of infection by cohort during SIREN follow-up, using a range of reinfection case definitions, between 18 June and 24 November 2020**

| Reinfections                             | n  | OR (95% CI)      | p-value | aOR* (95% CI)    | p-value |
|------------------------------------------|----|------------------|---------|------------------|---------|
| <b>Probable</b>                          | 2  | 0.01 (0.00-0.03) | <0.01   | 0.01 (0.00-0.03) | <0.01   |
| <b>Probable and symptomatic possible</b> | 15 | 0.06 (0.03-0.10) | <0.01   | 0.06 (0.03-0.09) | <0.01   |
| <b>Probable and all possible</b>         | 44 | 0.17 (0.13-0.24) | <0.01   | 0.17 (0.12-0.23) | <0.01   |

Note: odds ratio (OR); adjusted odds ratio (aOR); aOR adjusted for week group: reference group week 25 to 30; remaining week groups: week 31 to 47 (two-week time-periods)

## FIGURES

**Figure 1: Flow diagram describing participant flow and exclusion criteria for participants enrolled in SIREN between 18 June and 09 November 2020**

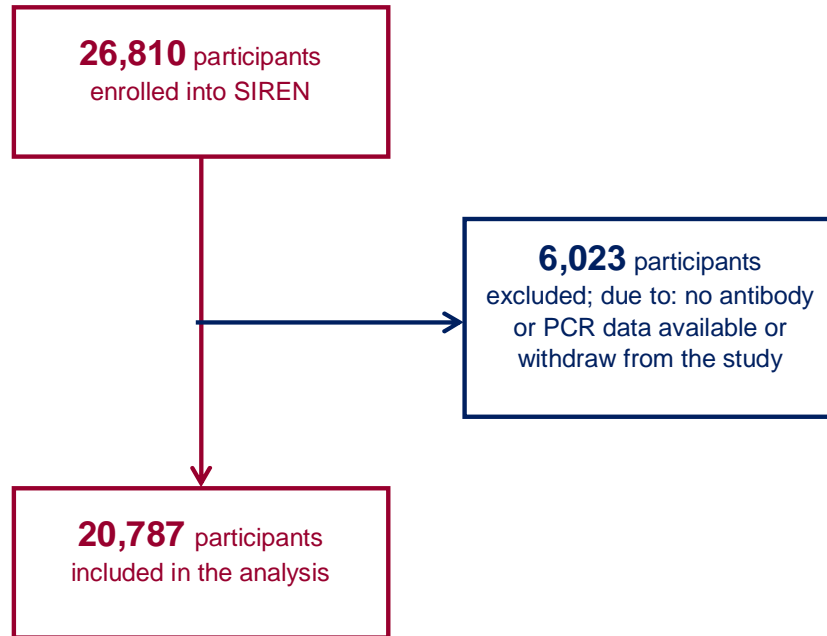

**Figure 2: Weekly frequency of SIREN participants with a first PCR positive test result by baseline cohort assignment, March to 24 November 2020**

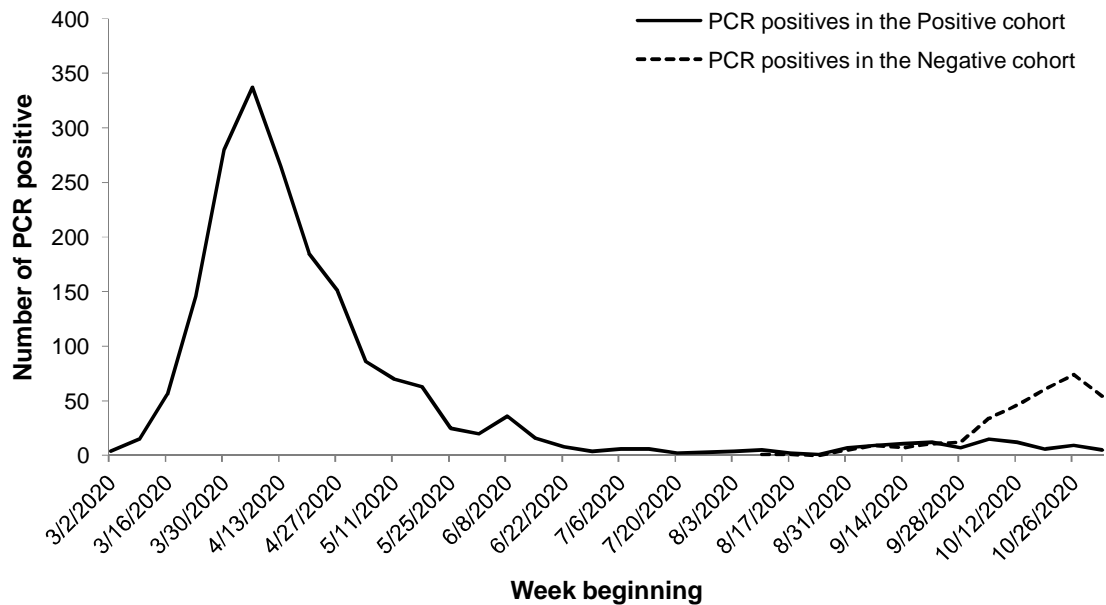



FINAL MANUSCRIPT

**Figure 3: Time to PCR positive result by cohort in SIREN participants, detected up to 24 November 2020**

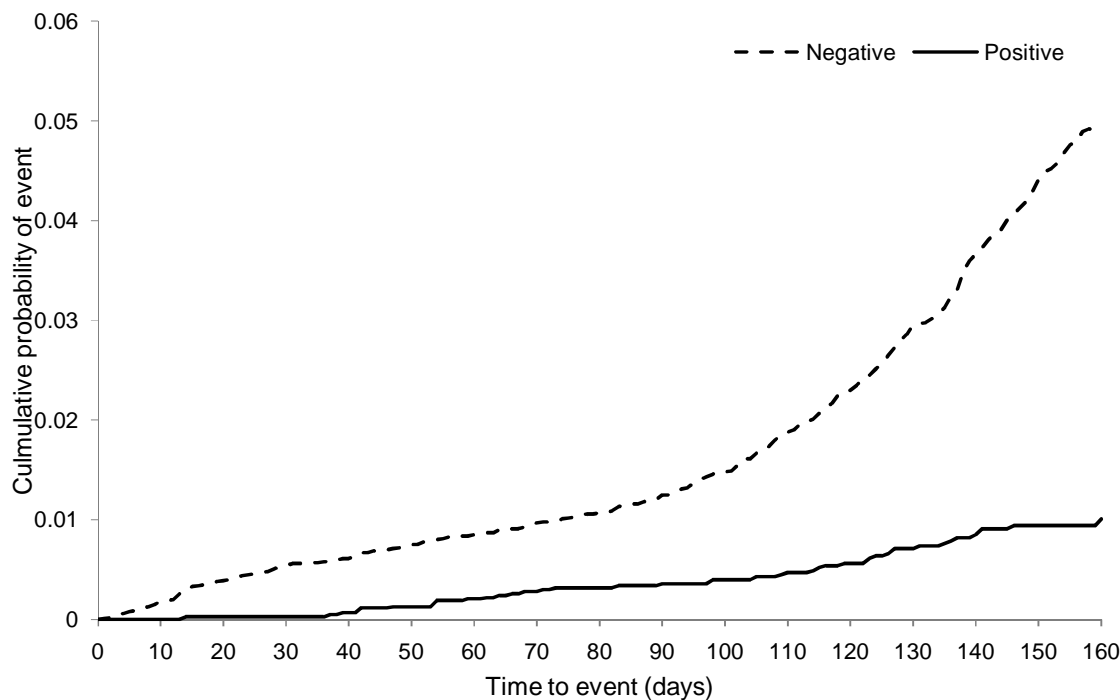

Note: 318 PCR positive results were reported in the negative cohort; 44 PCR reinfections (probable and possible reinfections) were detected in the positive cohort during SIREN follow-up to 24 November 2020. In the positive cohort follow-up time started from date of primary PCR positive, or primary symptom onset (if no historic PCR positive and history of COVID-19 symptoms reported) or date first antibody positive. In the negative cohort follow-up started at the date of first negative antibody result. Follow-up time has been truncated at 160 days due to the size of the risk-sets becoming very small

FINAL MANUSCRIPT

**Appendix A. Symptom list in questionnaire**

Cough, Fever, Anosmia, Dysgeusia, Sore throat, runny nose, headache, muscle aches, fatigue, diarrhoea, vomiting, itchy red patches.

**Appendix B.**

**Table Bi: Multivariable analysis of risk of infection by cohort during SIREN follow-up, probable reinfections, between 18 June and 24 November 2020 (n=2)**

| Characteristics              | OR (95% CI)       | p-value |
|------------------------------|-------------------|---------|
| Positive                     | 0.01 (0.00-0.03)  | <0.01   |
| <b>Week group</b>            |                   |         |
| 25 to 30                     | -                 | -       |
| 31 to 32                     | 0.12 (0.04-0.32)  | <0.01   |
| 33 to 34                     | 0.14 (0.06-0.32)  | <0.01   |
| 35 to 36                     | 0.27 (0.15-0.49)  | <0.01   |
| 37 to 38                     | 0.48 (0.31-0.75)  | <0.01   |
| 39 to 40                     | 0.40 (0.25-0.62)  | <0.01   |
| 41 to 42                     | 0.99 (0.68-1.45)  | 0.97    |
| 43 to 44                     | 1.05 (0.73-1.52)  | 0.79    |
| 45 to 47                     | 0.20 (0.12-0.32)  | 0.00    |
| <b>Age group</b>             |                   |         |
| 18 to 24                     | -                 | -       |
| 25 to 34                     | 0.70 (0.44-1.11)  | 0.13    |
| 35 to 44                     | 0.46 (0.29-0.73)  | <0.01   |
| 45 to 54                     | 0.64 (0.41-1.00)  | 0.05    |
| 55 to 64                     | 0.48 (0.30-0.78)  | <0.01   |
| Over 65                      | 0.25 (0.07-0.83)  | 0.02    |
| <b>Gender</b>                |                   |         |
| Male                         | -                 | -       |
| Female                       | 0.83 (0.63-1.09)  | 0.18    |
| Other                        | 1.40 (0.18-10.60) | 0.74    |
| <b>Ethnicity</b>             |                   |         |
| White                        | -                 | -       |
| BAME                         | 1.51 (1.12-2.04)  | 0.01    |
| <b>Staff group</b>           |                   |         |
| Nursing/Healthcare Assistant | -                 | -       |

FINAL MANUSCRIPT

|                          |                  |       |
|--------------------------|------------------|-------|
| Doctor                   | 0.66 (0.45-0.96) | 0.03  |
| Midwife                  | 0.83 (0.45-1.54) | 0.56  |
| Administrative/Executive | 0.75 (0.55-1.01) | 0.06  |
| Specialist staff         | 0.79 (0.50-1.24) | 0.30  |
| Estates/Porters/Security | 2.08 (0.95-4.55) | 0.07  |
| Pharmacist               | 0.89 (0.41-1.93) | 0.76  |
| Healthcare Scientist     | 0.48 (0.26-0.89) | 0.02  |
| Other                    | 0.73 (0.56-0.96) | 0.03  |
| <b>Region</b>            |                  |       |
| East Midlands            | -                | -     |
| East of England          | 0.52 (0.25-1.07) | 0.07  |
| London                   | 0.34 (0.17-0.68) | <0.01 |
| North East               | 1.98 (0.75-5.24) | 0.17  |
| North West               | 1.53 (0.86-2.74) | 0.15  |
| South East               | 0.58 (0.31-1.09) | 0.09  |
| South West               | 0.32 (0.17-0.59) | <0.01 |
| West Midlands            | 1.64 (0.87-3.10) | 0.13  |
| Yorkshire and the Humber | 1.77 (0.93-3.36) | 0.08  |

**Table Bii: Multivariable analysis of risk of infection by cohort during SIREN follow-up, probable and symptomatic possible reinfections, between 18 June and 24 November 2020 (n=15)**

| Characteristics   | OR (95% CI)      | p-value |
|-------------------|------------------|---------|
| Positive          | 0.06 (0.03-0.09) | <0.01   |
| <b>Week group</b> |                  |         |
| 25 to 30          | -                | -       |
| 31 to 32          | 0.11 (0.04-0.31) | <0.01   |
| 33 to 34          | 0.16 (0.07-0.35) | <0.01   |
| 35 to 36          | 0.28 (0.16-0.50) | <0.01   |
| 37 to 38          | 0.48 (0.31-0.75) | <0.01   |
| 39 to 40          | 0.39 (0.25-0.61) | <0.01   |
| 41 to 42          | 1.03 (0.71-1.49) | 0.89    |
| 43 to 44          | 1.05 (0.73-1.51) | 0.80    |
| 45 to 47          | 0.20 (0.13-0.32) | <0.01   |
| <b>Age group</b>  |                  |         |
| 18 to 24          | -                | -       |
| 25 to 34          | 0.72 (0.45-1.13) | 0.15    |
| 35 to 44          | 0.49 (0.31-0.77) | <0.01   |
| 45 to 54          | 0.68 (0.44-1.06) | 0.09    |

FINAL MANUSCRIPT

|                    |                              |                   |       |
|--------------------|------------------------------|-------------------|-------|
|                    | 55 to 64                     | 0.50 (0.31-0.81)  | <0.01 |
|                    | Over 65                      | 0.25 (0.07-0.84)  | 0.02  |
| <b>Gender</b>      |                              |                   |       |
|                    | Male                         | -                 | -     |
|                    | Female                       | 0.84 (0.64-1.10)  | 0.20  |
|                    | Other                        | 1.39 (0.18-10.46) | 0.75  |
| <b>Ethnicity</b>   |                              |                   |       |
|                    | White                        | -                 | -     |
|                    | BAME                         | 1.50 (1.12-2.02)  | 0.01  |
| <b>Staff group</b> |                              |                   |       |
|                    | Nursing/Healthcare Assistant | -                 | -     |
|                    | Doctor                       | 0.67 (0.46-0.97)  | 0.04  |
|                    | Midwife                      | 0.83 (0.45-1.53)  | 0.55  |
|                    | Administrative/Executive     | 0.78 (0.58-1.04)  | 0.09  |
|                    | Specialist staff             | 0.82 (0.53-1.28)  | 0.39  |
|                    | Estates/Porters/Security     | 2.02 (0.93-4.42)  | 0.08  |
|                    | Pharmacist                   | 0.90 (0.41-1.96)  | 0.79  |
|                    | Healthcare Scientist         | 0.52 (0.29-0.95)  | 0.03  |
|                    | Other                        | 0.74 (0.56-0.97)  | 0.03  |
| <b>Region</b>      |                              |                   |       |
|                    | East Midlands                | -                 | -     |
|                    | East of England              | 0.60 (0.30-1.19)  | 0.14  |
|                    | London                       | 0.33 (0.17-0.64)  | <0.01 |
|                    | North East                   | 1.88 (0.74-4.78)  | 0.19  |
|                    | North West                   | 1.53 (0.87-2.66)  | 0.14  |
|                    | South East                   | 0.59 (0.32-1.09)  | 0.09  |
|                    | South West                   | 0.32 (0.18-0.57)  | <0.01 |
|                    | West Midlands                | 1.60 (0.87-2.95)  | 0.13  |
|                    | Yorkshire and the Humber     | 1.67 (0.90-3.08)  | 0.10  |

FINAL MANUSCRIPT

**Table Biii: Multivariable analysis of risk of infection by cohort during SIREN follow-up, probable and all possible reinfections, between 18 June and 24 November 2020 (n=44)**

| Characteristics    | OR (95% CI)                  | p-value          |       |
|--------------------|------------------------------|------------------|-------|
|                    | Positive                     | 0.17 (0.12-0.23) | <0.01 |
| <b>Week group</b>  |                              |                  |       |
|                    | 25 to 30                     | -                | -     |
|                    | 31 to 32                     | 0.13 (0.05-0.32) | <0.01 |
|                    | 33 to 34                     | 0.20 (0.10-0.40) | <0.01 |
|                    | 35 to 36                     | 0.31 (0.18-0.52) | <0.01 |
|                    | 37 to 38                     | 0.46 (0.30-0.70) | <0.01 |
|                    | 39 to 40                     | 0.39 (0.25-0.59) | <0.01 |
|                    | 41 to 42                     | 0.97 (0.68-1.38) | 0.87  |
|                    | 43 to 44                     | 0.96 (0.68-1.36) | 0.81  |
|                    | 45 to 47                     | 0.20 (0.13-0.31) | <0.01 |
| <b>Age group</b>   |                              |                  |       |
|                    | 18 to 24                     | -                | -     |
|                    | 25 to 34                     | 0.67 (0.43-1.04) | 0.07  |
|                    | 35 to 44                     | 0.48 (0.31-0.75) | <0.01 |
|                    | 45 to 54                     | 0.67 (0.44-1.03) | 0.07  |
|                    | 55 to 64                     | 0.52 (0.33-0.81) | <0.01 |
|                    | Over 65                      | 0.24 (0.07-0.79) | 0.02  |
| <b>Gender</b>      |                              |                  |       |
|                    | Male                         | -                | -     |
|                    | Female                       | 0.84 (0.65-1.08) | 0.18  |
|                    | Other                        | 1.32 (0.18-9.85) | 0.79  |
| <b>Ethnicity</b>   |                              |                  |       |
|                    | White                        | -                | -     |
|                    | BAME                         | 1.47 (1.11-1.95) | 0.01  |
| <b>Staff group</b> |                              |                  |       |
|                    | Nursing/Healthcare Assistant | -                | -     |
|                    | Doctor                       | 0.72 (0.51-1.02) | 0.07  |
|                    | Midwife                      | 0.78 (0.42-1.43) | 0.42  |
|                    | Administrative/Executive     | 0.73 (0.55-0.97) | 0.03  |
|                    | Specialist staff             | 0.86 (0.56-1.31) | 0.48  |
|                    | Estates/Porters/Security     | 1.87 (0.86-4.07) | 0.11  |
|                    | Pharmacist                   | 0.90 (0.42-1.96) | 0.79  |
|                    | Healthcare Scientist         | 0.51 (0.28-0.91) | 0.02  |
|                    | Other                        | 0.72 (0.56-0.94) | 0.02  |
| <b>Region</b>      |                              |                  |       |
|                    | East Midlands                | -                | -     |

FINAL MANUSCRIPT

|                          |                  |       |
|--------------------------|------------------|-------|
| East of England          | 0.58 (0.30-1.10) | 0.10  |
| London                   | 0.36 (0.20-0.67) | <0.01 |
| North East               | 1.76 (0.73-4.25) | 0.21  |
| North West               | 1.50 (0.90-2.52) | 0.12  |
| South East               | 0.60 (0.34-1.05) | 0.07  |
| South West               | 0.36 (0.21-0.62) | <0.01 |
| West Midlands            | 1.55 (0.88-2.73) | 0.13  |
| Yorkshire and the Humber | 1.60 (0.90-2.84) | 0.11  |

---

FINAL MANUSCRIPT

**∞The SIREN study group:**

**Public Health England:** Andrews N, A Atti, H Aziz, T Brooks, CS Brown, C Carr, MA Chand, A Charlett, H Crawford, M Cole, J Conneely, S D'Arcangelo, J Ellis, S Evans, S Foulkes, N Gillson, R Gopal, V Hall, P Harrington, S Hopkins, J Hewson, K Hoschler, D Ironmonger, J Islam, M Kall, I Karagiannis, J Khawam, P Kirwan, R Kyffin. A Lackenby, M Lattimore, E Linley, J Lopez-Bernal, L Mabey, R McGregor, S Miah, E Monk, K Munro, Z Naheed, A Nissr, AM O'Connell, B Oguti, S Organ, J Osbourne, A Otter, M Patel, S Platt, D Pople, K Potts, M Ramsay, J Robotham, S Rokadiya, C Rowe, A Saei, G Sebbage, A Semper, M Shrotri, R Simmons, A Soriano, P Staves, S Taylor, A Taylor Kerr, A Tengbe, S Tonge, Vusirikala A, S Wallace E Wellington & M Zambon

**Glasgow Caledonian University:** L Price (and **Public Health Scotland**), L Haahr, S Stewart.

**Health and Social Care Agency Northern Ireland:** D Corrigan, M Sartaj, L Cromeay, S Campbell, K Braithwaite.

**Public Health Wales:** ED Lacey, G Stevens, L Partridge. **Health and Social Care**

**Research Wales:** C Norman, Y Ellis, H Hodgson.

**Participating SIREN sites:** Site Principal and co-investigators

Alder Hey Children's NHS Foundation Trust: S McWilliam, B Larru

Ashford and St Peter's Hospitals NHS Foundation Trust: S Winchester

Basildon and Thurrock University Hospitals NHS Foundation Trust: Dr A Pai, P Cieciva

Belfast Health & Social Care Trust: C Loughrey, A Watt

Birmingham Community Healthcare NHS Foundation Trust: F Adair, A Hawkins

Black Country Healthcare NHS Foundation Trust: A Grant, R Temple-Purcell

Blackpool Teaching Hospitals NHS Foundation Trust: J Howard, N Slawson

Bolton NHS Foundation Trust: Dr C Subudhi

Brighton and Sussex University Hospitals NHS Trust: Dr B S Davies, Dr A Bexley

Buckinghamshire Healthcare NHS Trust: N Wong, R Penn

FINAL MANUSCRIPT

Calderdale and Huddersfield NHS Foundation Trust: Dr G Boyd, Dr A Rajgopal  
Central and North West London NHS Foundation Trust: Dr A Arenas-Pinto, R Matthews  
Chesterfield Royal Hospital NHS Foundation Trust: A Whileman  
Cornwall Partnership NHS Foundation Trust: Dr R Laugharne, J Ledger  
Countess of Chester Hospital NHS Foundation Trust: Dr T Barnes, C Jones  
Dartford and Gravesham NHS Trust: Dr N Chitalia, D Botes  
Derbyshire Healthcare NHS Foundation Trust: G Harrison, S Akhtar  
Devon Partnership NHS Trust: S Horne, N Walker  
Doncaster and Bassetlaw Teaching Hospitals NHS Foundation Trust: K Agwuh, V Maxwell  
Dorset County Hospital NHS Foundation Trust: Dr J Graves, S Williams  
Dorset Healthcare University NHS Foundation Trust: Research & Development and Occupational Health departments  
East Suffolk and North Essex NHS Foundation Trust: P Ridley, A O'Kelly  
East Sussex Healthcare NHS Trust: Dr A Cowley  
Epsom and St Helier University Hospitals NHS Trust: H Johnstone, P Swift  
Frimley Health NHS Foundation Trust: M Meda, J Democratis  
George Eliot Hospital NHS Trust: C Callens  
Gloucestershire Hospitals NHS Foundation Trust: S Hams, S Beazer  
Golden Jubilee National Hospital: V Irvine  
Great Western Hospitals NHS Foundation Trust: C Forsyth, B Chandrasekaran  
Hampshire Hospitals NHS Foundation Trust: Dr C Thomas, J Radmore  
Hounslow and Richmond Community Healthcare NHS Trust: S Roberts, K Brown  
Hull University Teaching Hospitals NHS Trust: K Gajee, P Burns  
Imperial College Healthcare NHS Trust: F Sanderson, T M Byrne  
Isle of Wight NHS Trust: Dr E Macnaughton, S Knight  
James Paget University Hospitals NHS Foundation Trust: Prof B J L Burton, H Smith  
King's College Hospital NHS Foundation Trust: R Chaudhuri  
Lancashire & South Cumbria NHS Foundation Trust: Dr R Shorten, K Hollinshead  
Lancashire Teaching Hospitals NHS Foundation Trust: R J Shorten, H Cross  
Leeds Teaching Hospitals NHS Trust: J Murira, C Favager  
Leicestershire Partnership NHS Trust: Dr S Hamer, Dr S Baillon  
Lewisham and Greenwich NHS Trust: Dr J Russell, K Gantert  
Lincolnshire Partnership NHS Foundation Trust: Dr A Dave, D Brennan



FINAL MANUSCRIPT

Liverpool University Hospitals NHS Foundation Trust: Dr A Chawla, F Westell  
London North West University Healthcare NHS Trust: Dr D Adeboyeke, Dr Papineni  
Maidstone and Tunbridge Wells NHS Trust: C Pegg, M Williams  
Manchester University NHS Foundation Trust: Dr M Mirfenderesky, J Price  
Mid Cheshire Hospitals NHS Foundation Trust: C Gabriel, K Pagget  
Mid Essex Hospital Services NHS Trust: G Maloney, P Cieciciwa  
Mid Yorkshire Hospitals NHS Trust: Dr J Ashcroft, I Del Rosario  
Moorfields Eye Hospital NHS Foundation Trust: Dr. R Crosby-Nwaobi, C Reeks  
NHS Fife: S Fowler  
NHS Forth Valley: Dr Spears  
NHS Grampian: A Milne  
NHS Greater Glasgow And Clyde: J Anderson  
NHS Lothian: S Donaldson, K Templeton  
Norfolk and Norwich University Hospitals NHS Foundation Trust: Dr N Elumogo, L Coke  
North Cumbria Integrated Care NHS Foundation Trust: J Elliott, D Padgett  
North Middlesex University Hospital NHS Trust: M Mirfenderesky, J Price  
North West Anglia NHS Foundation Trust: I Sinanovic, S Joyce  
Northern Devon Healthcare NHS Trust: Dr T Lewis, M Howard  
Northern Lincolnshire and Goole NHS Foundation Trust: Dr P Cowling, D Potoczna  
Nottingham University Hospitals NHS Trust: S Brand  
Poole Hospital NHS Foundation Trust: Dr L Sheridan, B Wadams  
Portsmouth Hospitals NHS Trust: A Lloyd, J Moulard  
Queen Victoria Hospital NHS Foundation Trust: Dr J Giles, G Pottinger  
Royal Berkshire NHS Foundation Trust: H Coles, M Joseph  
Royal Bournemouth and Christchurch Hospitals NHS Foundation Trust: Dr M Lee, S Orr  
Royal Cornwall Hospitals NHS Trust: H Chenoweth  
Royal Devon and Exeter NHS Foundation Trust: C Auckland, R Lear  
Royal Free London NHS Foundation Trust: Dr A Rodger, Dr T Mahungu  
Royal National Orthopaedic Hospital NHS Trust: K Penny-Thomas  
Royal Papworth Hospital NHS Foundation Trust: Dr. S Pai, J Zamikula  
Royal Surrey County Hospital NHS Foundation Trust: E Smith, S Stone  
Royal United Hospitals Bath NHS Foundation Trust: E Boldock, D Howcroft

FINAL MANUSCRIPT

Salisbury NHS Foundation Trust: C Thompson

Sandwell and West Birmingham Hospitals NHS Trust: Dr M Aga, P Domingos

Sheffield Children's NHS Foundation Trust: Dr C Kerrison, S Gormley

Sheffield Teaching Hospitals NHS Foundation Trust: L Marsh, S Tazzyman

Sherwood Forest Hospitals NHS Foundation Trust: S Ambalkar, L Allsop

Shrewsbury and Telford Hospital NHS Trust: S Jose, M Beekes

Shropshire Community Health NHS Trust: J Tomlinson

Solent NHS Trust: C Price, A Jones

Somerset NHS Foundation Trust: Dr J Pepperell, M Schultz

Southend University Hospital NHS Foundation Trust: Dr J Day

Southern Health & Social Care Trust: A Boulos

Southern Health NHS Foundation Trust: E Defever, D McCracken

Southport and Ormskirk Hospital NHS Trust: Dr K Gray, K Brown

St George's University Hospitals NHS Foundation Trust: A Houston, T Planche

St Helens and Knowsley Teaching Hospitals NHS Trust: Dr M Z QAZZAFI

Stockport NHS Foundation Trust: J Marrs, S Bennett

Surrey and Sussex Healthcare NHS Trust: Dr K Nimako, Dr B Stewart

The Clatterbridge Cancer Centre NHS Foundation Trust: Dr S Khanduri, Prof N Kalakonda

The Dudley Group NHS Foundation Trust: Dr A Ashby

The Hillingdon Hospitals NHS Foundation Trust: N Mahabir, M Holden

The Newcastle Upon Tyne Hospitals NHS Foundation Trust: B Payne, J Harwood

The Princess Alexandra Hospital NHS Trust: K Court, N Staines

The Robert Jones and Agnes Hunt Orthopaedic Hospital NHS Foundation Trust: Dr R Longfellow

The Royal Wolverhampton NHS Trust: M E Green, L E Hughes

Torbay and South Devon NHS Foundation Trust: Dr M Halkes, P Mercer

United Lincolnshire Hospitals NHS Trust: A Roebuck, Research Team LCRF

University Hospital Southampton NHS Foundation Trust: Dr E Wilson-Davies

University Hospitals Bristol and Weston NHS Foundation Trust: R Lazarus, L Gallego

University Hospitals Coventry and Warwickshire NHS Trust: L Berry, N Aldridge

University Hospitals of Derby and Burton NHS Foundation Trust: Prof F Game, Prof T Reynolds

University Hospitals of Leicester NHS Trust: C Holmes, M Wiselka

FINAL MANUSCRIPT

University Hospitals of Morecambe Bay NHS Foundation Trust: A Higham

University Hospitals of North Midlands NHS Trust: C Duff, M Booth

University Hospitals Plymouth NHS Trust: H Jory, J Alderton

Walsall Healthcare NHS Trust: E Virgilio

Warrington and Halton Teaching Hospitals NHS Foundation Trust: Dr M Z Qazzafi, Dr T Chin

West Suffolk NHS Foundation Trust: Dr A M Moody, Dr R Tilley

Western Health & Social Care Trust: T Donaghy

Western Sussex Hospitals NHS Foundation Trust: R Sierra, K Shipman

Whittington Health NHS Trust: N Jones, G Mills

Wirral University Teaching Hospital NHS Foundation Trust: Dr D Harvey, Y W J Huang

Wye Valley NHS Trust: Dr L Robinson, J Birch

Yeovil District Hospital NHS Foundation Trust: Dr A Broadley, S Board

York Teaching Hospital NHS Foundation Trust: N Todd, C Laven

**SIREN Associated studies**

Oxford University Hospital study: DW Eyre, Big Data Institute, Nuffield Department of Population Health, University of Oxford, K Jeffery, Oxford University Hospitals NHS Foundation Trust,

Protective Immunity from T cells to Covid-19 in Health workers (PITCH): S Dunachie, P Klenerman, L Turtle, C Duncan.

The Humoral Immune Correlates for COVID-19 (HICC) consortium: JL Heeney, H Baxendale, W Schwaeble
